# Supplementary material for: ICESat-2 surface elevation assessment with kinematic GPS and static GNSS near the ice divide in Greenland
Source: Copernicus journal article supplement (doi:10.5194/egusphere-2025-2683), 2025-07-04
Supplement: Supplementary file [file egusphere-2025-2683-AC2-supplement.pdf]

We thank the reviewer for these valuable comments which will make this manuscript stronger. Please see our responses to each comment below in blue.

The manuscript entitled “ICESat-2 surface elevation assessment with kinematic GPS and static GNSS near the ice divide in Greenland” by Pickell and others details a new use for the Open GNSS Research Equipment (OGRE) GNSS-IR stations—validation of ICESat-2 surface height measurements. This study first uses data from repeat kinematic GPS surveys at Summit Station, Greenland to assess the stability of ICESat-2 surface height measurements, finding a  $<0.01$  m bias and  $<0.06$  m precision between kinematic GPS and ICESat-2 observations. The authors then present a new validation method using GNSS-IR interferometric reflectometry to measure surface elevation coincident with ICESat-2 passes over their study site near Summit Station. Ultimately finding a good agreement between GNSS-IR and kinematic GPS observations and a bias in ICESat-2 measurements of  $\sim 0.09$  m. These results indicate GNSS-IR can be deployed instead of kinematic GPS transects which are significantly more resource intensive.

I found the manuscript to be very well written with a robust methodology and results section wherein the results were well supported by the presented data. The manuscript would benefit from an elaboration on some methodology (detailed below) and a reorganization and expansion of the discussion section. I have detailed these points below and include some additional minor comments. Overall this work is appropriate for the Cryosphere and I would therefore recommend minor revisions before publication.

#### Major comments

(1) I would like some clarification on the bias corrections applied to the dataset. Section 3.3, Lines  $\sim 155$ . Here a bias of  $2.1 \pm 2.9$  cm is reported, citing figure A1. I have a few questions regarding figure A1, but with the main concern that this bias is not temporally consistent. Is the bias applied across the full time series as stated? It appears from Figure A1b that there is indeed a large bias in 2022, a moderate bias in 2023, and somewhat in early 2025. Why not apply a variable bias correction? Or not at all as it is not convincing that a bias correction of  $2.1 \pm 2.9$  cm would improve your observations. Regarding Figure A1: Which OGRE is this data from? Where was the stake relative to this OGRE and the study area? Also was there a camera that allowed such frequent stake readings?

Assessing the temporal bias of GNSS-IR is an important and ongoing area of research in the reflectometry community. Traditionally, snow depth reflectometry studies have only measured the height of the GNSS mast, without much consideration to the true footprint of the reflectometry technique. We attempt to address the footprint issue by deploying an OGRE at the “Summit Station” marker in Figure 1, centered within a grid of 121 snow stakes spaced 8 m apart [See details in Pickell, Hawley & LeWinter 2025]. While these stakes are each measured to the nearest half centimeter, seasonal biases may still exist due to human error, seasonal pitting or mounding at the base of the stakes, etc. Thus, we must be cautious about the attribution of bias, and especially time-varying bias, to the reflectometry technique.

We strike a compromise here by applying the overall mean bias correction to the OGRE, but we will adjust our language and descriptions to make the answers to your questions clear and to point out that the most important comparison between the altimetry and OGREs is the low variability between the ICESat-2 and OGRE measurements, which is independent of the OGRE bias correction.

(2) Figures supporting methodology (either added to manuscript or supplement) L75-78: What is the range of track depth Z\_track values due to vehicular weight depressing the snow at the beginning and end of your survey and the mean value used? L78-79: How did the laser range-finder measurements compare with the mean value of Z\_track measured? Were there any systematic trends in this value? E.g., increasing depression along the survey track? A figure showing the Ztrack observations and the laser range finder observations would be beneficial.

Typical track depth values range from 0 to several centimeters depending on the survey and season/snow conditions, and in general correlate with corresponding qualitative data that detail recent snowfall (deeper tracks) or cold, clear conditions (shallower tracks, e.g.). We will update the language to clarify our methodology here:

“The manual track-depth measurements (typically two per survey) provide a sparse estimate of the mean track depression, while the laser range-finder provides nearly continuous measurements along the track. Using the laser-derived standard deviation ( $\sigma \approx 2$  cm), the standard error of the manual mean is estimated as  $\pm 1.41$  cm, quantifying the uncertainty introduced by under-sampling.”

Unfortunately, we don't have more laser data from other survey dates from within this study to construct a full statistical analysis across the entire study period, and in general must take the routine, manual measurements at the beginning and end of each survey to be representative of the survey-wide track depth. However, our results from the laser rangefinder surveys are encouraging in that there is no systematic drift in track depth (e.g., indicative of changing snow conditions) for those particular surveys, which confirms the assumption that snow conditions are largely uniform in this region (although with some degree of sastrugi noise).

(3) I found that the discussion would benefit from some slight reorganization to make it easier to follow for the reader, in particular by separating the discussion of temporal and spatial sources of bias which are slightly intertwined (mainly the details presented in the middle to the end of paragraphs). Overall, the discussion does have a good organization by moving from those errors to external factors (e.g., blowing snow/surface roughness) then (correlated errors). But again, the authors should be careful to group like-ideas together (e.g., a discussion of the sensing footprint on line 248-249: is this an uncorrelated error or should it be moved to the spatial or surface roughness paragraphs? If it is kept in its current position the similarity of the sources of errors in the data should be made more evident.

We will structure sections of the discussion to more clearly separate temporal and spatial sources of bias. Specifically, details related to the sensing footprint will be adjacent to the discussion of spatial or

surface roughness–related errors, so that similar sources of error are grouped together to improve readability.

(4) The Manuscript would also benefit from an expanded discussion of the implications, next steps, or synthesis of the work presented here. For example, the introduction and abstract mention that kinematic surveys are much more labor and resource intensive than the OGRE station deployment, since these results demonstrate OGRES are a useful tool to assess ICESat-2 surface elevations, what are the authors recommendations moving forward? I would be great to hear their thoughts for how future campaigns aiming to assess airborne/space-borne surface elevation measurements should proceed. These topics are particularly relevant given NASA’s Snow4Flow program.

We agree that an expanded discussion of the implications and next steps would strengthen the manuscript. In the revised discussion section, we can highlight that OGRE deployments offer a lower-cost, logistically simpler alternative to kinematic GNSS surveys for evaluating ICESat-2 surface elevations. We note that while kinematic surveys remain valuable in specific settings, OGRES provide an efficient means to establish ground control across larger spatial and temporal scales, while reducing logistics. For example, radar altimetry validation could benefit from reflectometry given the reflectometry footprint is more agreeable with space-based radar, e.g. Or, with regards to Snow4Flow or NASA’s NISAR mission, we can leverage the movement of static stations (which nominally is a challenge for co-located measurements) to validate ice flow and elevation change together.

#### Minor comments

Figure 1 (a): I would suggest the north arrow be positioned on the top of the figure as it seems out of place near the scale bar. The legend for ICESat Traverse Route is somewhat misleading

We will experiment with alternative placements of the legend, scale bar, and north arrow to ensure that these elements do not obscure key data.

The authors should also adjust the font size in various labels to ensure they are large enough to read. Even when the figure spans the entire page width, some labels are very small (e.g., RGT #'s, “spacecraft travel direction”, the “10 km” scale bar, Surface elevation color bar, etc).

We will increase the font sizes as suggested.

Figure 1 (b) What is R\_5?

This is the location of the centroid of the fresnel zone of the reflected GNSS signal at a GNSS satellite elevation angle of 5°. We will increase the font and clarify this.

Figure 1 (c). This is a great cartoon of the kinematic GPS surveys. A small note is that H\_R is capitalized in the figure but H\_r is mentioned in the caption, update whichever to make sure symbology is consistent, also enlarge Z\_track (next to the arrow) in the figure.

We will fix this.

L85-90: Here only 24 hours of data are collected, you can expect the largest errors in positioning at the beginning and end of an observation period, and depending on the processing procedure, at day-breaks. Were longer periods of data collected and it was found that 12-hours before/after was optimal?

Our analysis was based on 24-hour continuous static GNSS sessions, which provide stable PPP static solutions. While shorter sessions (e.g., 3 hours) can show increased variability due to the convergence period, in our case the use of full 24-hour data spanning midnight does not degrade the solution or show edge effects, and allows for a fully-converged singular static estimate.

Figure 2: the x marking the median is difficult to see, I suggest changing the symbology, perhaps a - that is longer than the underlying point measurements are wide would be easier to see?

We will make this larger.

Section 2.2 and 2.3: What are the CSRS reported horizontal and vertical (Zppp) errors? These should be included in these sections for both types of GNSS stations. I know this is discussed later on but is important to include here as well. You can refer readers to Section 3.3 for a more detailed discussion.

We will add text that explains this. It is thought that the reported errors overestimate the precision so we will refer the reader to 3.3 for more details.

L147-149: Here the authors state that observations from the full 24-hour period are used to determine this 1.4 cm measurement precision, my question is, are edge effects (at the beginning and start of your time series) are removed or special filtering is applied, etc? If you instead take a centered, say 12-hour period, do you get the same 1.4cm precision?

Because PPP processing is performed in continuous static mode, the fact that some sessions span midnight does not introduce edge effects. We have not experimented with longer data windows due to battery constraints, but we do observe a decrease in precision if the window is, say, only 3 hours instead of 24. This is the tradeoff between precision and the potential for the surface to change during the observation period. In general we opt for the longer (24 hr) observation period to increase precision.

Figure 3: Suggestion: In the caption indicate that the subplots are arranged by OGRE location from west to east. Adding a bold title or something similar to the 879\* stations to indicate they are the stations along kinematic surveys would also be helpful for the reader.

We will update the caption to reflect this.

Figure 4 caption: typo: “for clarify” -> “to clarify?”

Fixed.

Can you put a point that matches the line color to mark these monthly observations? I agree the line is good for visual continuity but the points The up and downward pointing triangles are very hard to see. It appears they are centered on the line? Maybe offsetting these triangles either above or below all stations would make them more visible? Also maybe change the colors of some symbols specifically the x's marking Spot 3 and 4 which are difficult to see, particular the grey x or where there are overlaps. If the station colors are changed to a more muted color palette the symbols may be more easily seen? Regarding the “detected blowing snow” in particular, if present, blowing snow should be occurring across the entire study area and not necessarily concentrated on a few stations (due to high windspeed and abundance of snow). The presence of blowing snow could therefore be indicated at the top or bottom of the graph at each time period (by a symbol or shading vertically at that tilmestep) which would reduce some visual clutter.

We will standardize the symbology between the last two figures so that Spot 3 and 4 are consistent between both, and they are demarcated clearly.

L204: do you mean “Moreover”?

Corrected.

L218: “would” between “but” and “also”

Fixed.
